# Supplementary material for: Copula and ARMA based study of controlled outflow at Farakka barrage
Source: Copernicus journal article supplement (doi:10.5194/hess-2018-380), 2018-12-12
Supplement: Supplementary file 1 [file data.xlsx]

## Sheet: Sheet1
	MONTHLY DISCHARGE (In Qumec) FROM FARAKKA BARRAGE IN WEST BENGAL
YEAR	JAN	FEB	MAR	APR	MAY	JUN	JUL	AUG	SEP	OCT	NOV	DEC
1949	3249	3058	2516	2105	2981	5883	17810	43997	40283	18745	9773	4480
1950	3238	2892	2365	2039	1977	6665	26673	51340	36951	11591	5457	3659
1951	2919	2589	2091	1850	1957	4491	21305	31333	30134	10768	4580	3268
1952	2309	1685	1411	1294	1627	3936	24815	40802	33333	11953	5820	3761
1953	2304	1946	1564	1228	1359	2942	24569	49411	36982	15014	5966	3717
1954	2798	2410	2607	1985	1937	5696	23134	62694	41424	20759	6991	3887
1955	2807	2668	2008	1499	1705	3891	33922	61363	52121	29764	9754	5106
1956	3460	2829	2235	1937	2807	10199	23482	47602	43415	27375	10719	5399
1957	4224	3508	2641	2176	1922	2484	17856	39765	37021	9705	4473	3042
1958	2449	2154	1849	1652	1954	2423	14350	53410	39848	26097	7733	4224
1959	978	3062	2342	1866	1864	3980	14250	43717	32093	21400	7424	3924
1960	2667	2119	1962	1693	1535	3188	19448	40943	39015	23856	7917	4468
1961	2731.76	2418.95	2014.43	1751.05	1984.48	4314.43	20793.4	43030	36899.3	17592.9	6836.67	3984.52
1962	2707.13	2388.52	1990.54	1734.19	1937.02	4239.73	20935.5	42983.9	36738.2	17538	6696.84	3960.93
1963	2681.85	2364.55	1972.71	1719.68	1935.12	4124.25	20662.3	42586	36728	17821.2	6755.88	3975.31
1964	2670.56	2353.86	1967.08	1713.47	1934.08	4106.78	20631.7	43121.8	37042	18157	6859.49	4008.99
1965	3087	2431	2124	2122	2915	3492	12090	27790	27810	10160	6153	3591
1966	2726	2341	1972	1403	1429	2762	14690	35570	26270	7131	3831	3070
1967	2394	2083	1509	1494	1636	3232	18950	34340	45930	15280	4990	3863
1968	3051	2360	1843	1608	1576	4232	23437	37104	19331	15874	5483	3363
1969	2265	1773	1491	1472	1710	4112	17004	46262	35098	17855	6636	3977
1970	2564	2145	1999	1754	1950	4948	22358	34186	38992	16894	5668	3463
1971	2408	1962	1782	1969	2594	1181	33815	65072	49568	17490	9401	5365
1972	3181	2697	2387	2032	2032	3834	14047	19042	24693	10686	4786	3371
1973	2289	2086	1605	1594	2207	7032	18657	37886	44573	31053	10015	4677
MEAN	2726.33	2412.96	2009.91	1747.62	1978.59	4295.53	20787.4	43014	36891.7	17622.4	6828.76	3984.19
STDEV	575.347	429.751	342.452	261.161	431.087	1794.51	5453.96	10595.9	7535.28	6348.55	1892.72	641.115
